# Supplementary material for: Factors Associated with COVID-19 Vaccine Booster Hesitancy: A Retrospective Cohort Study, Fukushima Vaccination Community Survey
Source: MDPI journal article supplement (doi:10.3390/vaccines10040515), 2022-03-26
Supplement: s1 [file s1]

**Supplementary Table S1.** A logistic regression to identify variables associated with vaccine avoidance

|                                     | <b>B (se)</b> | <b>OR (95% CI)</b> | <b><i>p</i>-Value</b> |
|-------------------------------------|---------------|--------------------|-----------------------|
| Age                                 | −0.200        | 0.98 (0.96–1.00)   | 0.034                 |
| Sex (base: male)                    | 0.117         | 1.12 (0.63–2.01)   | 0.70                  |
| <b>Adverse reaction at 2nd dose</b> |               |                    |                       |
| 37.5 °C fever                       | −0.032        | 0.97 (0.49–1.91)   | 0.93                  |
| fatigue                             | −0.486        | 0.62 (0.32–1.18)   | 0.142                 |
| headache                            | 0.267         | 1.31 (0.66–2.59)   | 0.45                  |
| joint pain                          | −0.163        | 0.85 (0.45–1.61)   | 0.62                  |
| nausea                              | 1.423         | 4.15 (1.82–9.47)   | 0.001                 |
| IgG antibody titer                  | 0.958         | 2.61 (1.31–5.18)   | 0.006                 |
